# Supplementary figures and images for: Shear stress-induced influx of extracellular calcium ions: a pivotal trigger amplifying the production of mesenchymal stem cell-derived extracellular vesicles
Source: Royal Society of Chemistry journal article supplement (doi:10.1039/d4nr01215a), 2024-08-28

(a)

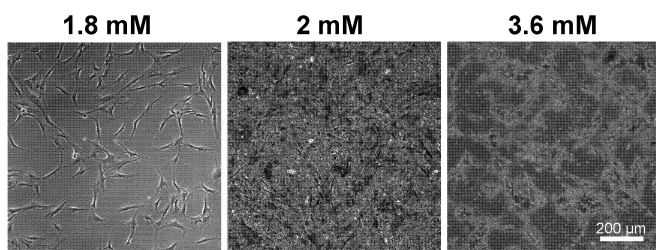

(b)

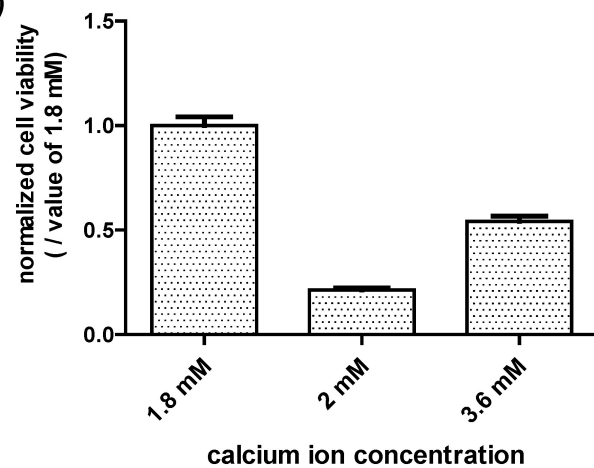

Supplement: d4nr01215a3.pdf [file d4nr01215a3.pdf]

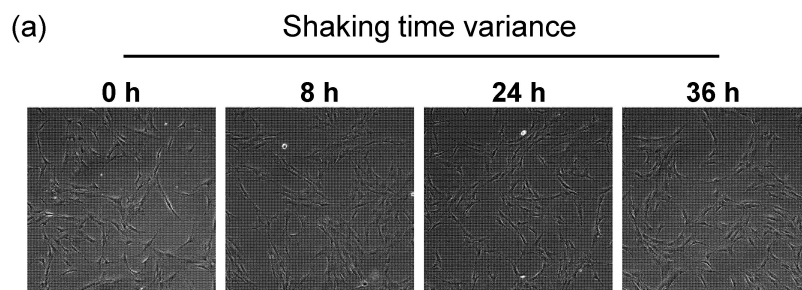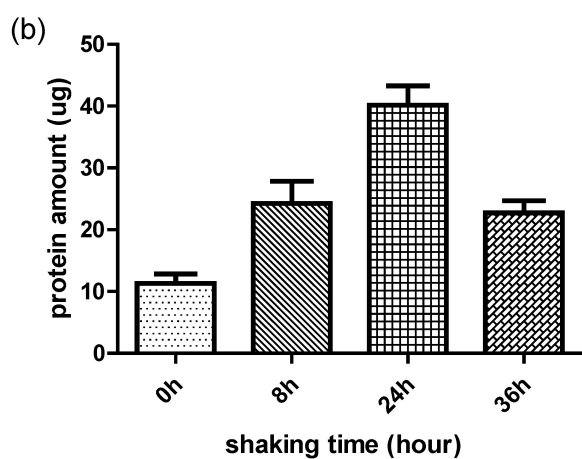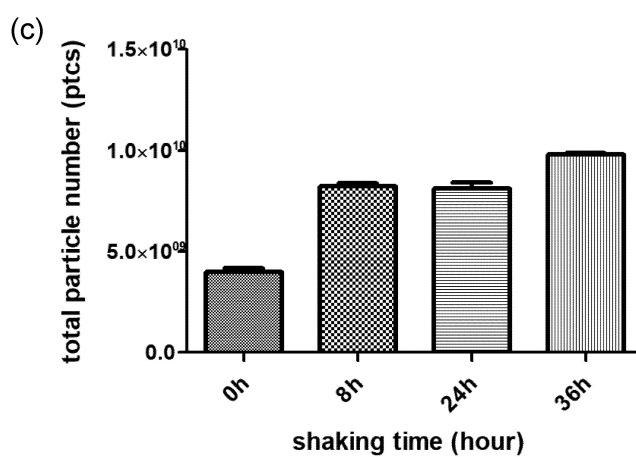

Supplement: d4nr01215a4.pdf [file d4nr01215a4.pdf]

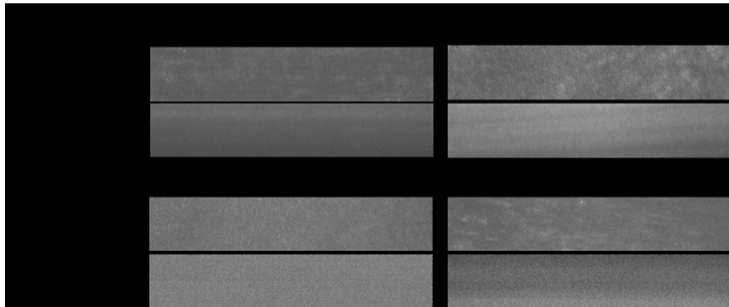

Supplement: d4nr01215a5.pdf [file d4nr01215a5.pdf]

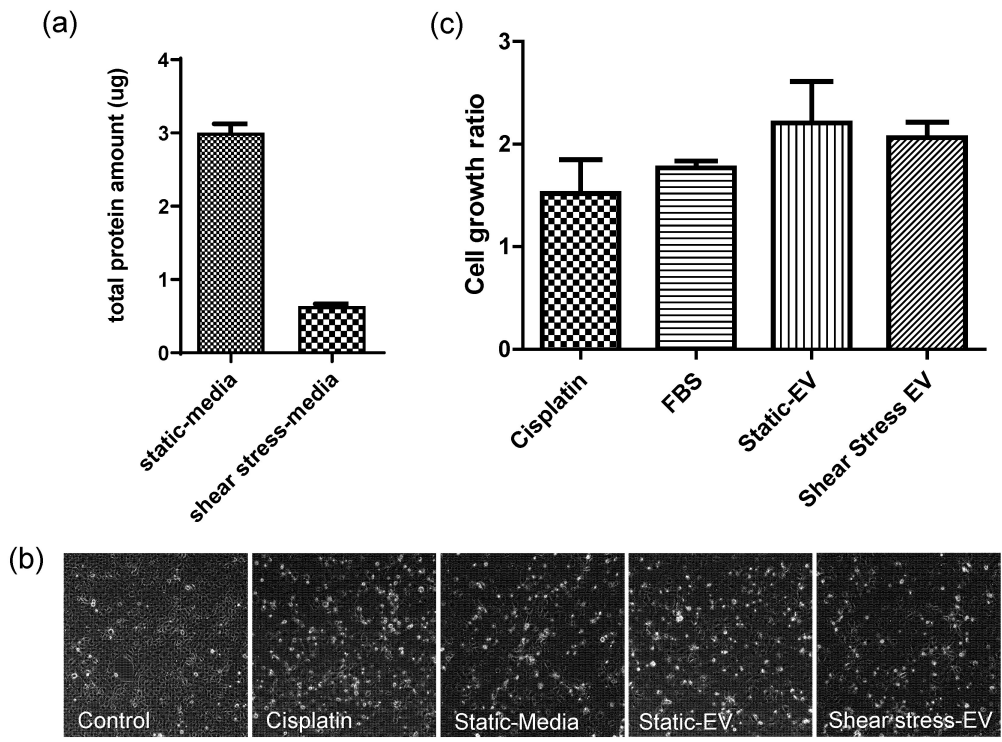

Supplement: d4nr01215a6.pdf [file d4nr01215a6.pdf]

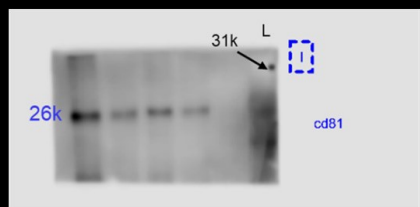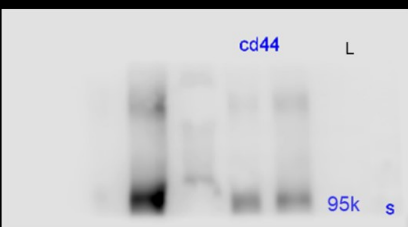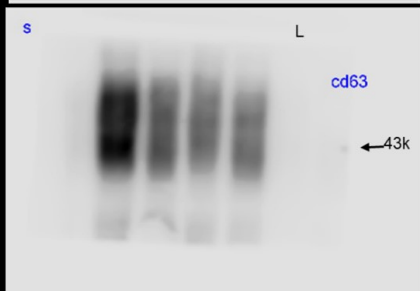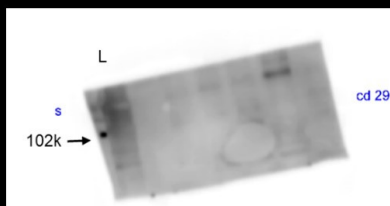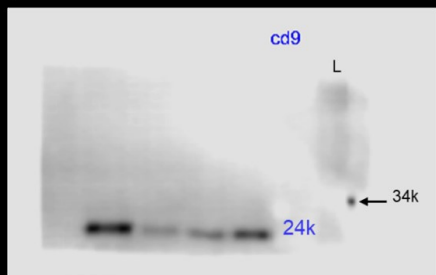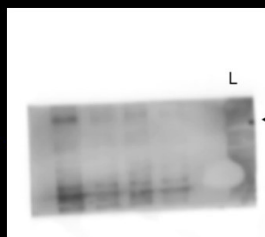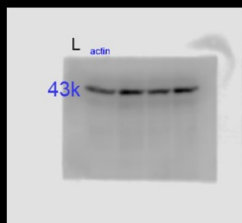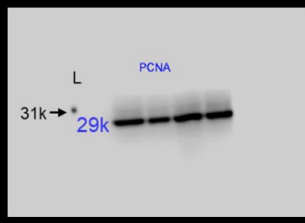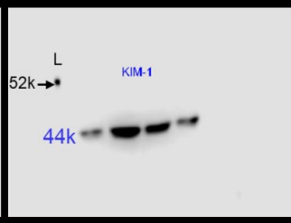

Supplement: d4nr01215a7.pdf [file d4nr01215a7.pdf]
